# Supplementary material for: Allometric, Growth, and Biomass Estimation Models for Acacia dealbata Link.: A Case Study in Serra da Estrela Natural Park (Portugal)
Source: MDPI journal article supplement (doi:10.3390/environments9080104), 2022-08-16
Supplement: s1 [file s1]

Supplementary Materials

Assmann (1943)

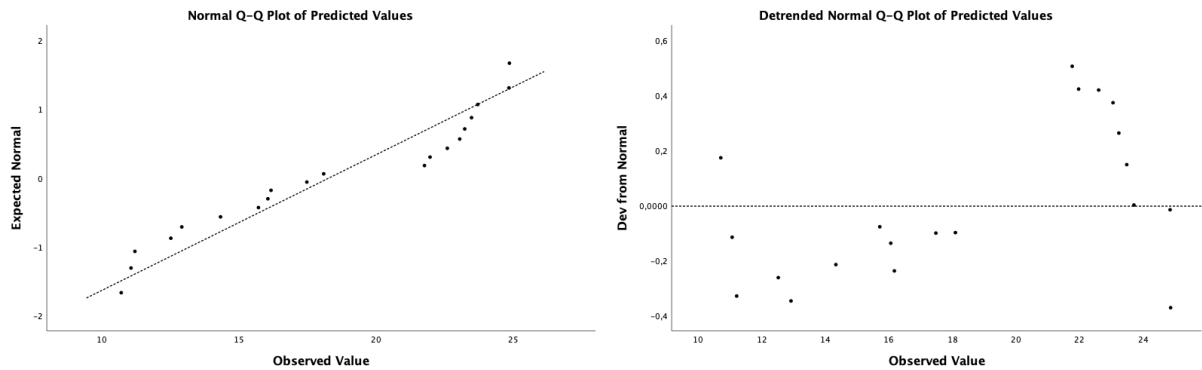

Prodan (1951)

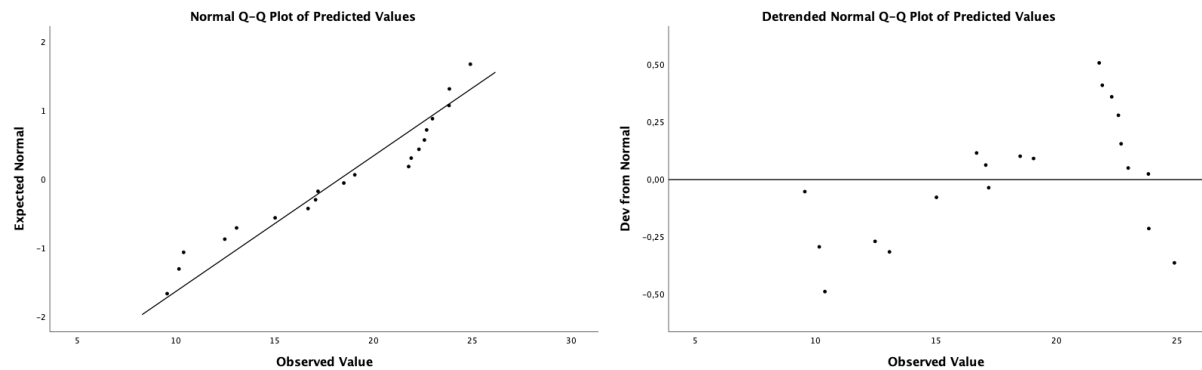

Petterson (1955)

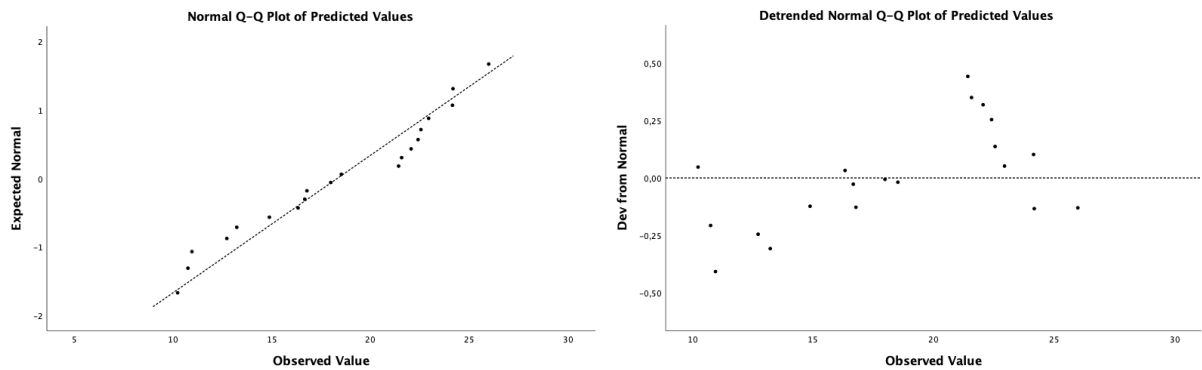

Korsun (1935)

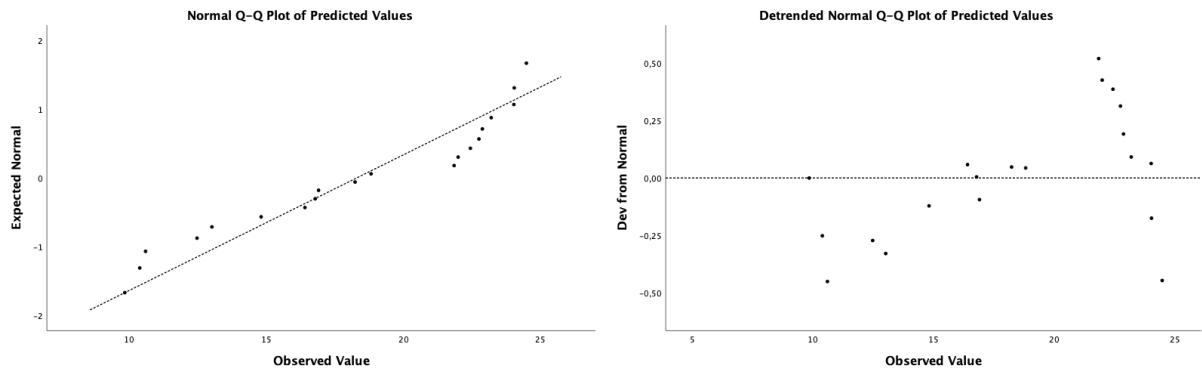

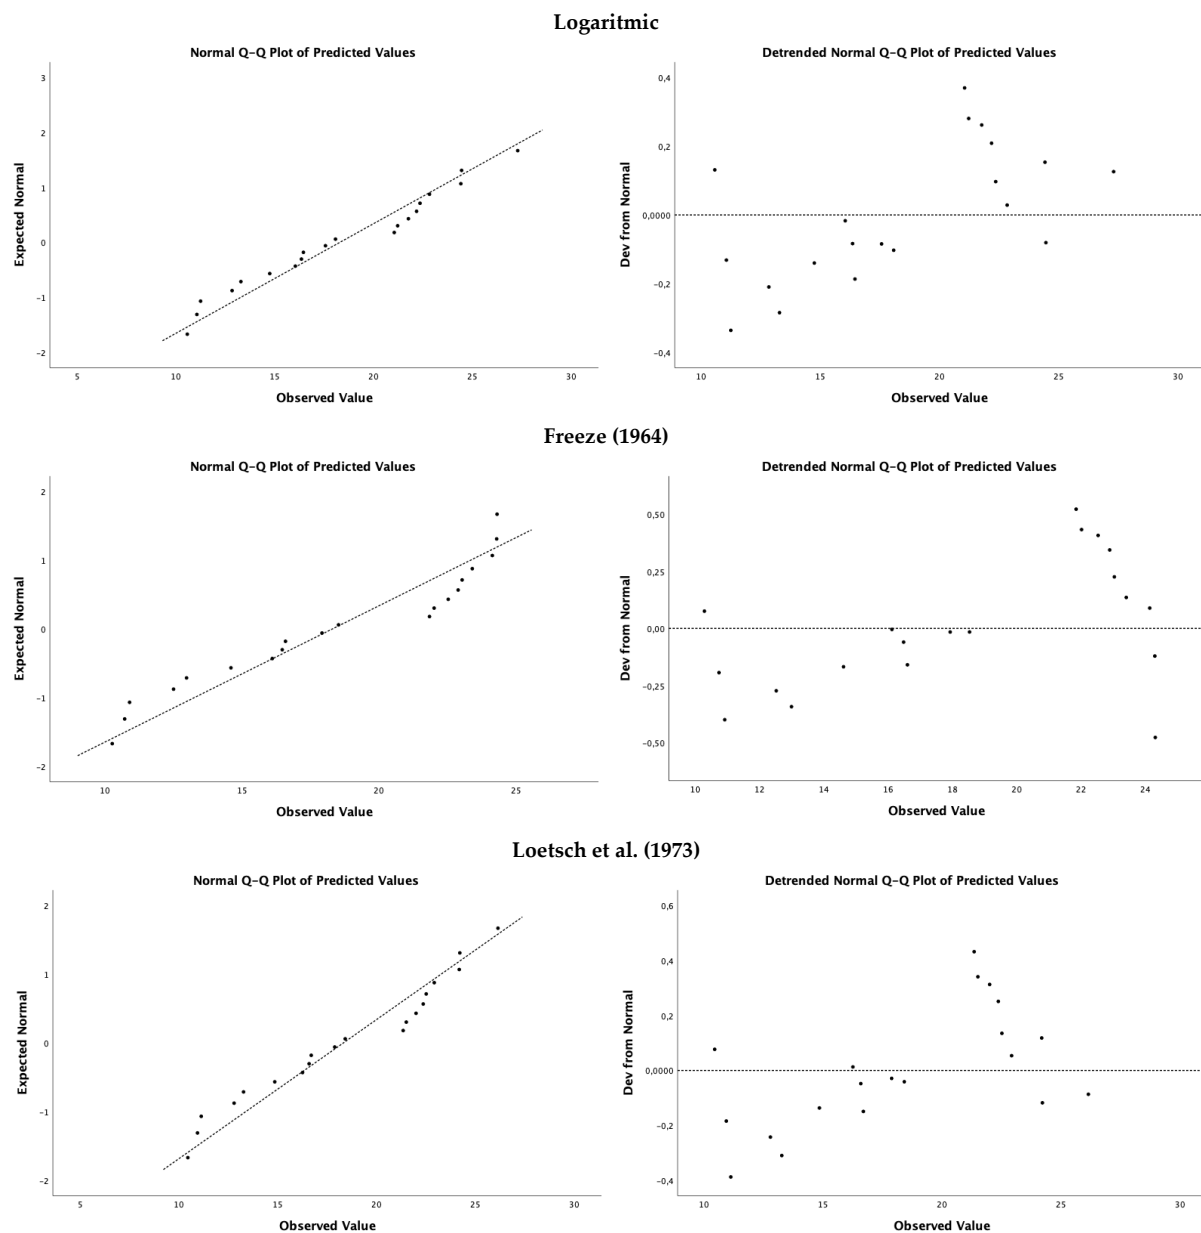

**Figure S1.** Projection of the predicted values around the expected normal, the projection of the deviation of the predicted values from the normal, and the error of the predicted values.

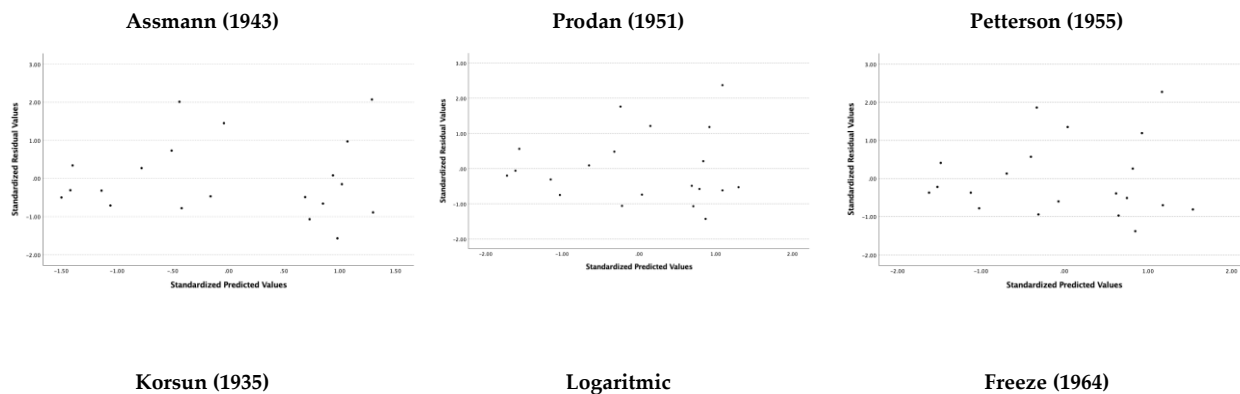

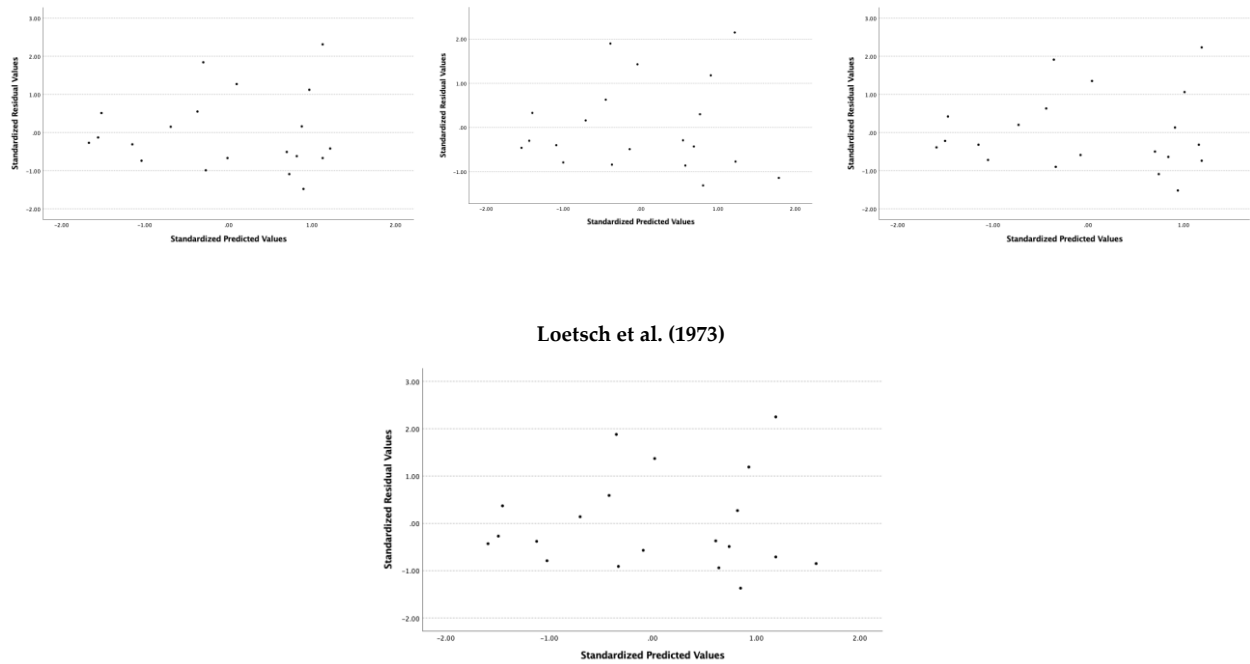

**Figure S2.** Homoscedasticity evaluation.

**Table S1.** Results from the measurements to the trees, P – Parcel; Spec. – Species; T nr. – Tree number; DC – Distance to the center of the circle (Parcel); Dir. – Direction; d<sub>1</sub> – Diameter; d<sub>2</sub> – Diameter; d<sub>med</sub> – Average diameter; DHB class – Diameter at breast high class; h<sub>t</sub> – Trunk height; h<sub>c</sub> – Canopy height; d<sub>canopy</sub> – Canopy diameter; W<sub>t</sub> – Trunk weight; w<sub>b</sub> – branches weight; A.d. – *Acacia dealbata*; A.u. – *Arbutus unedo*; P.p. – *Pinus pinaster*.

| P | Spec. | T nr. | DC<br>(m) | Dir.<br>(°) | d <sub>1</sub><br>(cm) | d <sub>2</sub><br>(cm) | d <sub>med</sub><br>(cm) | DHB<br>class<br>(cm) | h <sub>t</sub><br>(m) | h <sub>c</sub><br>(m) | d <sub>canopy</sub><br>(m) | W <sub>t</sub><br>(kg) | W <sub>b</sub><br>(kg) |
|---|-------|-------|-----------|-------------|------------------------|------------------------|--------------------------|----------------------|-----------------------|-----------------------|----------------------------|------------------------|------------------------|
| 1 | A.d.  | 1     | 0.73      | 4           | 4.7                    | 4.8                    | 4.75                     | 5                    | -                     | -                     | -                          | -                      | -                      |
| 1 | A.d.  | 2     | 1.8       | 30          | 5                      | 4.6                    | 4.8                      | 5                    | -                     | -                     | -                          | -                      | -                      |
| 1 | A.d.  | 3     | 3.3       | 5           | 10.6                   | 9.9                    | 10.25                    | 15                   | 17.3                  | 6.3                   | 1                          | 52.5                   | 2.1                    |
| 1 | A.d.  | 4     | 4.1       | 5           | 4.4                    | 3.7                    | 4.05                     | 5                    | -                     | -                     | -                          | -                      | -                      |
| 1 | A.d.  | 5     | 3.9       | 10          | 7.1                    | 6.7                    | 6.9                      | 10                   | 10.46                 | 4.9                   | 1                          | 23.6                   | 5.2                    |
| 1 | A.d.  | 6     | 4.8       | 60          | 9.7                    | 7.2                    | 8.45                     | 10                   | -                     | -                     | -                          | -                      | -                      |
| 1 | A.u.  | 7     | 4.5       | 85          | -                      | -                      | -                        | -                    | -                     | -                     | -                          | -                      | -                      |
| 1 | A.d.  | 8     | 3.6       | 90          | 30.4                   | 31                     | 30.7                     | 35                   | -                     | -                     | -                          | -                      | -                      |
| 1 | A.d.  | 9     | 4.5       | 100         | 6.8                    | 6.8                    | 6.8                      | 10                   | -                     | -                     | -                          | -                      | -                      |
| 1 | A.d.  | 10    | 5.1       | 85          | 4.3                    | 4.2                    | 4.25                     | 5                    | -                     | -                     | -                          | -                      | -                      |
| 1 | A.d.  | 11    | 5.1       | 90          | 5                      | 5.6                    | 5.3                      | 10                   | 9                     | 3.5                   | 1.9                        | 11                     | 2.6                    |
| 1 | A.d.  | 12    | 5.2       | 97          | 4.2                    | 4.1                    | 4.15                     | 5                    | -                     | -                     | -                          | -                      | -                      |
| 1 | A.d.  | 13    | 5.2       | 98          | 6.5                    | 6.8                    | 6.65                     | 10                   | -                     | -                     | -                          | -                      | -                      |
| 1 | A.d.  | 14    | 5.2       | 99          | 3.5                    | 3.5                    | 3.5                      | 5                    | -                     | -                     | -                          | -                      | -                      |
| 1 | A.d.  | 15    | 5.6       | 97          | 3.7                    | 3.7                    | 3.7                      | 5                    | -                     | -                     | -                          | -                      | -                      |
| 1 | A.d.  | 16    | 5.2       | 100         | 8.1                    | 8                      | 8.05                     | 10                   | 12.93                 | 5.54                  | 2                          | 45                     | 2.8                    |
| 1 | A.d.  | 17    | 4.4       | 101         | 5.4                    | 5.6                    | 5.5                      | 10                   | 8.3                   | 3                     | 2.5                        | 14.2                   | 4.3                    |
| 1 | A.u.  | 18    | 4.2       | 100         | 4.3                    | 4                      | 4.15                     | 5                    | -                     | -                     | -                          | -                      | -                      |
| 1 | A.d.  | 19    | 5.1       | 115         | 14.6                   | 15.2                   | 14.9                     | 15                   | -                     | -                     | -                          | -                      | -                      |
| 1 | A.d.  | 20    | 5.3       | 126         | 12.5                   | 12.2                   | 12.35                    | 15                   | -                     | -                     | -                          | -                      | -                      |

|   |      |    |      |     |      |      |       |    |       |      |     |       |      |
|---|------|----|------|-----|------|------|-------|----|-------|------|-----|-------|------|
| 1 | A.d. | 21 | 4.2  | 117 | 5.9  | 5.7  | 5.8   | 10 | 7.75  | 2.5  | 3.2 | 15.6  | 4.1  |
| 1 | A.d. | 22 | 5.45 | 130 | 4.6  | 4.5  | 4.55  | 5  | -     | -    | -   | -     | -    |
| 1 | A.d. | 23 | 5.4  | 129 | 3.4  | 3.6  | 3.5   | 5  | -     | -    | -   | -     | -    |
| 1 | P.p. | 24 | 5.35 | 130 | 23.1 | 22.6 | 22.85 | -  | -     | -    | -   | -     | -    |
| 1 | A.d. | 25 | 5.6  | 138 | 8.2  | 9    | 8.6   | 10 | -     | -    | -   | -     | -    |
| 1 | A.d. | 26 | 5.3  | 141 | 17.4 | 16.7 | 17.05 | 20 | -     | 13.8 | 1.2 | 223.6 | 25.5 |
| 1 | A.d. | 27 | 5.4  | 143 | 4.3  | 4.1  | 4.2   | 5  | 5.8   | 3    | 1.2 | -     | -    |
| 1 | A.d. | 28 | 5.6  | 155 | 6.7  | 6.4  | 6.55  | 10 | -     | -    | -   | -     | -    |
| 1 | A.d. | 29 | 5.3  | 160 | 4.4  | 4.5  | 4.45  | 5  | 6.8   | 3.1  | 1.8 | 3.6   | -    |
| 1 | A.d. | 30 | 5.3  | 162 | 8.3  | 8.4  | 8.35  | 10 | 13.75 | 9.93 | 1   | 43.5  | 2    |
| 1 | A.d. | 31 | 2.9  | 186 | 17.9 | 18.2 | 18.05 | 20 | -     | -    | -   | -     | -    |
| 1 | A.d. | 32 | 3.5  | 185 | 8.5  | 8.4  | 8.45  | 10 | -     | -    | -   | -     | -    |
| 1 | A.d. | 33 | 1.9  | 196 | 16.7 | 16.7 | 16.7  | 20 | -     | -    | -   | -     | -    |
| 1 | A.d. | 34 | 2.3  | 210 | 5.2  | 5.3  | 5.25  | 10 | -     | -    | -   | -     | -    |
| 1 | A.d. | 35 | 1.8  | 220 | 5.2  | 4.7  | 4.95  | 5  | -     | -    | -   | -     | -    |
| 1 | A.d. | 36 | 1.8  | 235 | 10.1 | 10   | 10.05 | 15 | -     | -    | -   | -     | -    |
| 1 | A.d. | 37 | 5.4  | 222 | 16.6 | 15.2 | 15.9  | 20 | -     | -    | -   | -     | -    |
| 1 | A.d. | 38 | 5    | 230 | 3.4  | 3.3  | 3.35  | 5  | -     | -    | -   | -     | -    |
| 1 | A.d. | 39 | 5.6  | 242 | 13   | 13   | 13    | 15 | -     | -    | -   | -     | -    |
| 1 | A.d. | 40 | 5.3  | 244 | 22.2 | 21.6 | 21.9  | 25 | -     | -    | -   | -     | -    |
| 1 | A.d. | 41 | 4.1  | 245 | 11.7 | 10.8 | 11.25 | 15 | -     | -    | -   | -     | -    |
| 1 | A.d. | 42 | 4    | 258 | 4.3  | 4.4  | 4.35  | 5  | -     | -    | -   | -     | -    |
| 1 | A.d. | 43 | 4.8  | 272 | 4.6  | 5.2  | 4.9   | 5  | -     | -    | -   | -     | -    |
| 1 | A.d. | 44 | 4.4  | 290 | 4.5  | 4    | 4.25  | 5  | -     | -    | -   | -     | -    |
| 1 | A.d. | 45 | 4.2  | 295 | 10.8 | 10.2 | 10.5  | 15 | -     | -    | -   | -     | -    |
| 1 | A.d. | 46 | 3.9  | 310 | 16.7 | 17.8 | 17.25 | 20 | -     | -    | -   | -     | -    |
| 1 | A.d. | 47 | 3.9  | 320 | 14.5 | 16.4 | 15.45 | 20 | -     | -    | -   | -     | -    |
| 1 | A.d. | 48 | 4.1  | 340 | 14.2 | 15.6 | 14.9  | 15 | -     | -    | -   | -     | -    |
| 1 | A.d. | 49 | 5.2  | 0   | 4.6  | 4.8  | 4.7   | 5  | -     | -    | -   | -     | -    |
| 1 | A.d. | 50 | 5.4  | 2   | 14.3 | 15.4 | 14.85 | 15 | -     | -    | -   | -     | -    |
| 1 | A.d. | 51 | 5.5  | 5   | 3.6  | 3.2  | 3.4   | 5  | -     | -    | -   | -     | -    |
| 1 | A.d. | 52 | 5.6  | 20  | 7.4  | 8.7  | 8.05  | 10 | -     | -    | -   | -     | -    |
| 2 | A.d. | 1  | 3.5  | 62  | 6.1  | 6    | 6.05  | 10 | -     | -    | -   | -     | -    |
| 2 | A.d. | 2  | 5.3  | 114 | 10.4 | 11.5 | 10.95 | 15 | -     | -    | -   | -     | -    |
| 2 | A.d. | 3  | 5.3  | 115 | 10.7 | 11.3 | 11    | 15 | -     | -    | -   | -     | -    |
| 2 | A.d. | 4  | 5.5  | 116 | 4.4  | 4.7  | 4.55  | 5  | -     | -    | -   | -     | -    |
| 2 | A.d. | 5  | 5.5  | 120 | 10.4 | 11.3 | 10.85 | 15 | -     | -    | -   | -     | -    |
| 2 | A.d. | 6  | 5.4  | 123 | 5.8  | 5.6  | 5.7   | 10 | -     | -    | -   | -     | -    |
| 2 | A.d. | 7  | 5.6  | 138 | 11.9 | 13.7 | 12.8  | 15 | -     | -    | -   | -     | -    |
| 2 | A.d. | 8  | 4.5  | 150 | 6.3  | 5.9  | 6.1   | 10 | -     | -    | -   | -     | -    |
| 2 | A.d. | 9  | 5    | 158 | 14   | 15.2 | 14.6  | 15 | -     | -    | -   | -     | -    |
| 2 | A.d. | 10 | 4.7  | 165 | 9.7  | 9.6  | 9.65  | 10 | -     | -    | -   | -     | -    |
| 2 | A.d. | 11 | 5    | 165 | 4.6  | 4.5  | 4.55  | 5  | -     | -    | -   | -     | -    |
| 2 | A.d. | 12 | 5    | 168 | 9.1  | 10   | 9.55  | 10 | -     | -    | -   | -     | -    |
| 2 | A.d. | 13 | 5.6  | 168 | 13.2 | 12.4 | 12.8  | 15 | -     | -    | -   | -     | -    |
| 2 | A.d. | 14 | 1.8  | 185 | 3.4  | 3.2  | 3.3   | 5  | -     | -    | -   | -     | -    |

|   |      |    |     |     |      |      |       |    |      |    |      |       |      |
|---|------|----|-----|-----|------|------|-------|----|------|----|------|-------|------|
| 2 | A.d. | 15 | 1   | 195 | 23.2 | 20.4 | 21.8  | 25 | 21.7 | 11 | 2.65 | 301.7 | 31.7 |
| 2 | A.d. | 16 | 1.5 | 200 | 4.6  | 4.5  | 4.55  | 5  | -    | -  | -    | -     | -    |
| 2 | A.d. | 17 | 3.8 | 225 | 6.4  | 6.3  | 6.35  | 10 | -    | -  | -    | -     | -    |
| 2 | A.d. | 18 | 4.9 | 227 | 9.3  | 9    | 9.15  | 10 | -    | -  | -    | -     | -    |
| 2 | A.d. | 19 | 3.5 | 239 | 4    | 4    | 4     | 5  | -    | -  | -    | -     | -    |
| 2 | A.d. | 20 | 1.7 | 265 | 5.5  | 6.8  | 6.15  | 10 | -    | -  | -    | -     | -    |
| 2 | A.d. | 21 | 4   | 318 | 16.9 | 19.6 | 18.25 | 20 | -    | -  | -    | -     | -    |
| 2 | A.d. | 22 | 4.8 | 305 | 12.6 | 14.3 | 13.45 | 15 | -    | -  | -    | -     | -    |
| 2 | A.d. | 23 | 5.6 | 286 | 9    | 8.5  | 8.75  | 10 | -    | -  | -    | -     | -    |
| 2 | P.p. | 24 | 5   | 285 | 40.7 | 42.2 | 41.45 | -  | -    | -  | -    | -     | -    |
| 2 | A.d. | 25 | 5   | 303 | 4.1  | 4    | 4.05  | 5  | -    | -  | -    | -     | -    |
| 2 | A.d. | 26 | 3.7 | 315 | 8.8  | 9.4  | 9.1   | 10 | -    | -  | -    | -     | -    |
| 2 | A.d. | 27 | 3.4 | 328 | 6.4  | 6    | 6.2   | 10 | -    | -  | -    | -     | -    |
| 2 | A.d. | 28 | 2   | 323 | 5.7  | 6.2  | 5.95  | 10 | -    | -  | -    | -     | -    |
| 2 | A.d. | 29 | 1.9 | 323 | 5.3  | 5    | 5.15  | 10 | -    | -  | -    | -     | -    |
| 2 | A.d. | 30 | 4.5 | 326 | 13.3 | 12.7 | 13    | 15 | -    | -  | -    | -     | -    |
| 2 | A.d. | 31 | 1.8 | 98  | 7.7  | 8.8  | 8.25  | 10 | -    | -  | -    | -     | -    |

**Table S2.** Evolution of growth increments (in mm) of each of the trees selected for this study.

| Parcel | Tree  | Year since birth |     |     |     |     |     |      |      |      |      |      |      |      |      |      |      |      |      |      |      |      |
|--------|-------|------------------|-----|-----|-----|-----|-----|------|------|------|------|------|------|------|------|------|------|------|------|------|------|------|
|        |       | 1                | 2   | 3   | 4   | 5   | 6   | 7    | 8    | 9    | 10   | 11   | 12   | 13   | 14   | 15   | 16   | 17   | 18   | 19   | 20   | 21   |
| 1      | P1A1  | 0.0              | 0.7 | 2.2 | 3.9 | 5.4 | 6.6 | 8.5  | 10.2 | 10.9 | -    | -    | -    | -    | -    | -    | -    | -    | -    | -    | -    | -    |
|        | P1A2  | 0.0              | 0.8 | 2.2 | 3.5 | 4.0 | 4.9 | 5.4  | 6.1  | 7.0  | -    | -    | -    | -    | -    | -    | -    | -    | -    | -    | -    | -    |
|        | P1A3  | 0.0              | 0.8 | 2.8 | 3.8 | 4.2 | 4.8 | 5.6  | 6.9  | 7.3  | 7.8  | 8.1  | 8.6  | 9.2  | -    | -    | -    | -    | -    | -    | -    | -    |
|        | P1A4  | 0.0              | 0.7 | 1.3 | 2.0 | 2.8 | 3.7 | 5.7  | 7.1  | 8.5  | 9.7  | 10.3 | 11.5 | 13.2 | 14.1 | 16.0 | 17.6 | -    | -    | -    | -    | -    |
|        | P1A5  | 0.0              | 1.3 | 1.9 | 2.5 | 3.2 | 4.0 | 4.9  | 5.7  | 6.2  | 6.8  | -    | -    | -    | -    | -    | -    | -    | -    | -    | -    | -    |
|        | P1A6  | 0.0              | 0.7 | 1.5 | 2.2 | 2.5 | 3.0 | 3.6  | 4.1  | 4.5  | -    | -    | -    | -    | -    | -    | -    | -    | -    | -    | -    | -    |
|        | P1A7  | 0.0              | 1.9 | 3.9 | 5.2 | 7.3 | 9.7 | 10.6 | 11.4 | 11.9 | 12.8 | 13.5 | 14.0 | -    | -    | -    | -    | -    | -    | -    | -    | -    |
|        | P1A8  | 0.0              | 1.2 | 1.9 | 3.1 | 4.4 | 5.9 | 7.6  | 9.0  | 10.1 | 11.5 | 12.1 | 12.9 | 13.6 | 14.1 | -    | -    | -    | -    | -    | -    | -    |
|        | P1A9  | 0.0              | 1.4 | 2.4 | 2.9 | 3.3 | 3.7 | -    | -    | -    | -    | -    | -    | -    | -    | -    | -    | -    | -    | -    | -    | -    |
|        | P1A10 | 0.0              | 1.1 | 1.4 | 2.3 | 2.6 | 3.2 | 4.3  | 5.1  | 5.8  | 6.7  | 7.5  | -    | -    | -    | -    | -    | -    | -    | -    | -    | -    |
|        | P1A11 | 0.0              | 0.4 | 2.2 | 3.6 | 5.4 | 7.3 | 8.9  | 9.8  | 10.6 | 11.0 | 12.0 | 12.7 | 14.2 | 14.9 | -    | -    | -    | -    | -    | -    | -    |
| 2      | P2A1  | 0.0              | 1.1 | 1.6 | 3.9 | 4.6 | 5.6 | 6.7  | 8.1  | 8.8  | 9.8  | 10.6 | 11.1 | 11.6 | 12.4 | 13.0 | -    | -    | -    | -    | -    | -    |
|        | P2A2  | 0.0              | 0.8 | 1.2 | 4.2 | 5.1 | 5.9 | 6.3  | 6.9  | 7.2  | 8.0  | -    | -    | -    | -    | -    | -    | -    | -    | -    | -    | -    |
|        | P2A3  | 0.0              | 1.1 | 2.2 | 2.7 | 3.0 | 3.5 | 3.8  | 4.2  | 4.2  | -    | -    | -    | -    | -    | -    | -    | -    | -    | -    | -    | -    |
|        | P2A4  | 0.0              | 1.1 | 1.6 | 4.3 | 5.8 | 7.2 | 8.6  | 10.1 | 11.2 | 12.4 | 12.8 | 14.9 | 15.7 | 16.8 | 17.5 | 19.2 | 19.8 | 20.8 | 22.4 | -    | -    |
|        | P2A5  | 0.0              | 0.9 | 1.7 | 2.6 | 3.1 | 3.7 | 4.4  | 5.0  | 5.3  | 5.7  | 6.1  | -    | -    | -    | -    | -    | -    | -    | -    | -    | -    |
|        | P3A1  | 0.0              | 1.1 | 3.1 | 5.0 | 6.0 | 7.0 | 8.8  | 9.8  | 10.8 | 15.7 | 19.5 | 21.7 | 24.4 | 26.2 | 28.3 | 29.3 | 31.1 | 32.6 | 33.7 | 34.7 | 35.5 |

As can be seen from the data obtained and shown in Table 5, the trees found in this stand do not have advanced ages, it is only possible to find a 21 years old tree, while the rest have younger ages, being one 6 years old tree, three 9 years old trees, two 10 years old trees, two 11 years old trees, one 12 years old tree, one 13 years old tree, two 14 years old trees, one 15 years old tree, one 16 years old tree and one 19 years old.

**Table S3.** Data obtained in the sampling operations and used to create the models.

| Parcel | Tree nr. | h <sub>trunk</sub> (m) | h <sub>coppice</sub> (m) | h <sub>total</sub> (m) | d <sub>coppice</sub> (m) | DBH (cm) | W <sub>trunk</sub> (kg) | W <sub>branches_leaves</sub> (kg) | W <sub>total</sub> (kg) | Age (years) |
|--------|----------|------------------------|--------------------------|------------------------|--------------------------|----------|-------------------------|-----------------------------------|-------------------------|-------------|
| 1      | 3        | 17.3                   | 6.3                      | 23.6                   | 1                        | 10.25    | 52.5                    | 2.1                               | 54.6                    | 10          |
| 1      | 5        | 10.46                  | 4.9                      | 15.36                  | 1                        | 6.9      | 23.6                    | 5.2                               | 28.8                    | 5           |
| 1      | 6        | 10.35                  | 2.85                     | 13.2                   | 2.1                      | 8.45     | 29.7                    | 3.8                               | 33.5                    | 14          |
| 1      | 8        | 16.2                   | 6.7                      | 22.9                   | 9.5                      | 30.7     | 578.9                   | 15.9                              | 594.8                   | 20          |
| 1      | 16       | 12.93                  | 5.54                     | 18.47                  | 2                        | 8.05     | 45                      | 2.8                               | 47.8                    | 10          |
| 1      | 17       | 8.3                    | 3                        | 11.3                   | 2.5                      | 5.5      | 14.2                    | 4.3                               | 18.5                    | 9           |
| 1      | 19       | 14.2                   | 3.7                      | 17.9                   | 4.3                      | 14.9     | 145.8                   | 21                                | 166.8                   | 12          |
| 1      | 26       | 13.8                   | 3.5                      | 17.3                   | 1.2                      | 17.05    | 223.6                   | 25.5                              | 249.1                   | 14          |
| 1      | 27       | 5.8                    | 3                        | 8.8                    | 1.2                      | 4.2      | 43.5                    | 3.1                               | 46.6                    | 10          |
| 1      | 29       | 6.8                    | 3.1                      | 9.9                    | 1.8                      | 4.45     | 3.6                     | 1.9                               | 5.5                     | 6           |
| 1      | 30       | 13.75                  | 9.93                     | 23.68                  | 1                        | 8.35     | 43.5                    | 2                                 | 45.5                    | 9           |
| 1      | 31       | 19.6                   | 7.8                      | 27.4                   | 4.8                      | 18.05    | 267.4                   | 15.5                              | 282.9                   | 16          |
| 1      | 33       | 17.75                  | 5.6                      | 23.35                  | 3.8                      | 16.7     | 205                     | 18.9                              | 223.9                   | 14          |
| 1      | 37       | 16.8                   | 3.3                      | 20.1                   | 4.4                      | 15.9     | 202.3                   | 8.9                               | 211.2                   | 17          |
| 2      | 9        | 15.4                   | 4.53                     | 19.93                  | 3.4                      | 14.6     | 131.2                   | 7.7                               | 138.9                   | 15          |
| 2      | 10       | 12.1                   | 3.6                      | 15.7                   | 1.9                      | 9.65     | 38.9                    | 1.8                               | 40.7                    | 10          |
| 2      | 11       | 9                      | 3.5                      | 12.5                   | 1.9                      | 4.55     | 11                      | 2.6                               | 13.6                    | 9           |
| 2      | 15       | 21.7                   | 11                       | 32.7                   | 2.65                     | 21.8     | 301.7                   | 31.7                              | 333.4                   | 17          |
| 2      | 21       | 7.75                   | 2.5                      | 10.25                  | 3.2                      | 5.8      | 15.6                    | 4.1                               | 19.7                    | 12          |
| 2      | 30       | 17.2                   | 4.3                      | 21.5                   | 2.7                      | 21.9     | 173.9                   | 19.4                              | 193.3                   | 15          |

Data for the characterization of *A. dealbata* stands, as previously mentioned in Section 2, were obtained by measuring, weighing, and counting the growth rings, in the case of age estimation. The data obtained for the height of the trunk (h<sub>trunk</sub>) presented a minimum value of 5.8 m and a maximum value of 21.7 m, with an average value of 13.78±4.5 m. The canopy height (h<sub>canopy</sub>) had a minimum value of 2.5 m and a maximum value of 11.0 m, with an average value of 4.0±2.4 m. The total height (h<sub>total</sub>) presented a minimum value of 8.8 m and a maximum value of 32.7 m, with an average value of 18.19±6.3 m. The canopy diameter (d<sub>canopy</sub>) had a minimum value of 1.0 m and a maximum value of 4.8 m, with an average value of 2.3±2.9 m. The diameter at breast height (DBH) had a minimum value of 4.2 cm and a maximum value of 30.7 cm, with a mean value of 9.95±7.2 cm. The weight of the trunk (w<sub>trunk</sub>) presented a minimum value of 3.6 kg and a maximum value of 578.9 kg, with an average value of 48.75±142.5 kg. The weight of the branches (w<sub>branches\_leaves</sub>) presented a minimum value of 2.0 kg and a maximum value of 31.7 kg, with an average value of 4.75±9.2 kg. The total weight (w<sub>total</sub>) presented a minimum value of 5.5 kg and a maximum value of 594.8 kg, with an average value of 51.2±149.1 kg. The age of the trees presented a minimum value of 5 years and a maximum value of 20 years, with an average value of 12.0±3.9 years.

**Table S4.** Cumulative data per year of growth for height and diameter.

| t (year) | d (cm) | h (m) | t (year) | d (cm) | h (m) | t (year) | d (cm) | h (m) |
|----------|--------|-------|----------|--------|-------|----------|--------|-------|
| 2        | 0.7    | 0.5   | 5        | 3.0    | 2     | 9        | 7.2    | 4     |
| 2        | 0.8    | 0.5   | 5        | 5.8    | 2     | 9        | 4.2    | 4     |
| 2        | 0.8    | 0.5   | 5        | 3.1    | 2     | 9        | 11.2   | 4     |
| 2        | 0.7    | 0.5   | 5        | 6.0    | 2     | 9        | 5.3    | 4     |
| 2        | 1.3    | 0.5   | 6        | 6.6    | 2.5   | 9        | 10.8   | 4     |
| 2        | 0.7    | 0.5   | 6        | 4.9    | 2.5   | 10       | 7.8    | 4.5   |
| 2        | 1.9    | 0.5   | 6        | 4.8    | 2.5   | 10       | 9.7    | 4.5   |
| 2        | 1.2    | 0.5   | 6        | 3.7    | 2.5   | 10       | 6.8    | 4.5   |
| 2        | 1.4    | 0.5   | 6        | 4.0    | 2.5   | 10       | 12.8   | 4.5   |
| 2        | 1.1    | 0.5   | 6        | 3.0    | 2.5   | 10       | 11.5   | 4.5   |
| 2        | 0.4    | 0.5   | 6        | 9.7    | 2.5   | 10       | 6.7    | 4.5   |
| 2        | 1.1    | 0.5   | 6        | 5.9    | 2.5   | 10       | 11.0   | 4.5   |

|   |     |     |   |      |     |    |      |     |
|---|-----|-----|---|------|-----|----|------|-----|
| 2 | 0.8 | 0.5 | 6 | 3.7  | 2.5 | 10 | 9.8  | 4.5 |
| 2 | 1.1 | 0.5 | 6 | 3.2  | 2.5 | 10 | 8.0  | 4.5 |
| 2 | 1.1 | 0.5 | 6 | 7.3  | 2.5 | 10 | 12.4 | 4.5 |
| 2 | 0.9 | 0.5 | 6 | 5.6  | 2.5 | 10 | 5.7  | 4.5 |
| 2 | 1.1 | 0.5 | 6 | 5.9  | 2.5 | 10 | 15.7 | 4.5 |
| 3 | 2.2 | 1   | 6 | 3.5  | 2.5 | 11 | 8.1  | 5   |
| 3 | 2.2 | 1   | 6 | 7.2  | 2.5 | 11 | 10.3 | 5   |
| 3 | 2.8 | 1   | 6 | 3.7  | 2.5 | 11 | 13.5 | 5   |
| 3 | 1.3 | 1   | 6 | 7.0  | 2.5 | 11 | 12.1 | 5   |
| 3 | 1.9 | 1   | 7 | 8.5  | 3   | 11 | 7.5  | 5   |
| 3 | 1.5 | 1   | 7 | 5.4  | 3   | 11 | 12.0 | 5   |
| 3 | 3.9 | 1   | 7 | 5.6  | 3   | 11 | 10.6 | 5   |
| 3 | 1.9 | 1   | 7 | 5.7  | 3   | 11 | 12.8 | 5   |
| 3 | 2.4 | 1   | 7 | 4.9  | 3   | 11 | 6.1  | 5   |
| 3 | 1.4 | 1   | 7 | 3.6  | 3   | 11 | 19.5 | 5   |
| 3 | 2.2 | 1   | 7 | 10.6 | 3   | 12 | 8.6  | 5.5 |
| 3 | 1.6 | 1   | 7 | 7.6  | 3   | 12 | 11.5 | 5.5 |
| 3 | 1.2 | 1   | 7 | 4.3  | 3   | 12 | 14.0 | 5.5 |
| 3 | 2.2 | 1   | 7 | 8.9  | 3   | 12 | 12.9 | 5.5 |
| 3 | 1.6 | 1   | 7 | 6.7  | 3   | 12 | 12.7 | 5.5 |
| 3 | 1.7 | 1   | 7 | 6.3  | 3   | 12 | 11.1 | 5.5 |
| 3 | 3.1 | 1   | 7 | 3.8  | 3   | 12 | 14.9 | 5.5 |
| 4 | 3.9 | 1.5 | 7 | 8.6  | 3   | 12 | 21.7 | 5.5 |
| 4 | 3.5 | 1.5 | 7 | 4.4  | 3   | 13 | 9.2  | 6   |
| 4 | 3.8 | 1.5 | 7 | 8.8  | 3   | 13 | 13.2 | 6   |
| 4 | 2.0 | 1.5 | 8 | 10.2 | 3.5 | 13 | 13.6 | 6   |
| 4 | 2.5 | 1.5 | 8 | 6.1  | 3.5 | 13 | 14.2 | 6   |
| 4 | 2.2 | 1.5 | 8 | 6.9  | 3.5 | 13 | 11.6 | 6   |
| 4 | 5.2 | 1.5 | 8 | 7.1  | 3.5 | 13 | 15.7 | 6   |
| 4 | 3.1 | 1.5 | 8 | 5.7  | 3.5 | 13 | 24.4 | 6   |
| 4 | 2.9 | 1.5 | 8 | 4.1  | 3.5 | 14 | 14.1 | 6.5 |
| 4 | 2.3 | 1.5 | 8 | 11.4 | 3.5 | 14 | 14.1 | 6.5 |
| 4 | 3.6 | 1.5 | 8 | 9.0  | 3.5 | 14 | 14.9 | 6.5 |
| 4 | 3.9 | 1.5 | 8 | 5.1  | 3.5 | 14 | 12.4 | 6.5 |
| 4 | 4.2 | 1.5 | 8 | 9.8  | 3.5 | 14 | 16.8 | 6.5 |
| 4 | 2.7 | 1.5 | 8 | 8.1  | 3.5 | 14 | 26.2 | 6.5 |
| 4 | 4.3 | 1.5 | 8 | 6.9  | 3.5 | 15 | 16.0 | 7   |
| 4 | 2.6 | 1.5 | 8 | 4.2  | 3.5 | 15 | 13.0 | 7   |
| 4 | 5.0 | 1.5 | 8 | 10.1 | 3.5 | 15 | 17.5 | 7   |
| 5 | 5.4 | 2   | 8 | 5.0  | 3.5 | 15 | 28.3 | 7   |
| 5 | 4.0 | 2   | 8 | 9.8  | 3.5 | 16 | 17.6 | 7.5 |
| 5 | 4.2 | 2   | 9 | 10.9 | 4   | 16 | 19.2 | 7.5 |
| 5 | 2.8 | 2   | 9 | 7.0  | 4   | 16 | 29.3 | 7.5 |
| 5 | 3.2 | 2   | 9 | 7.3  | 4   | 17 | 19.8 | 8   |
| 5 | 2.5 | 2   | 9 | 8.5  | 4   | 17 | 31.1 | 8   |
| 5 | 7.3 | 2   | 9 | 6.2  | 4   | 18 | 20.8 | 8.5 |
| 5 | 4.4 | 2   | 9 | 4.5  | 4   | 18 | 32.6 | 8.5 |
| 5 | 3.3 | 2   | 9 | 11.9 | 4   | 19 | 22.4 | 9   |
| 5 | 2.6 | 2   | 9 | 10.1 | 4   | 19 | 33.7 | 9   |
| 5 | 5.4 | 2   | 9 | 5.8  | 4   | 20 | 34.7 | 9.5 |
| 5 | 4.6 | 2   | 9 | 10.6 | 4   | 21 | 35.5 | 10  |
| 5 | 5.1 | 2   | 9 | 8.8  | 4   |    |      |     |

---

**Table S5.** DBH of the 59 trees located in the two reference transects and the values obtained from the application of the equation generated according to the model of Petterson (1955) and from the application of the equation generated according to the model of Loetsch et al. (1973).

| DBH   | Petterson (1955)<br>Model Predicted<br>Values | Loetsch et al. (1973)<br>Model Predicted<br>Values | DBH   | Petterson (1955)<br>Model Predicted<br>Values | Loetsch et al. (1973)<br>Model Predicted<br>Values |
|-------|-----------------------------------------------|----------------------------------------------------|-------|-----------------------------------------------|----------------------------------------------------|
| 4.75  | 11.38                                         | 12.03                                              | 14.9  | 21.66                                         | 21.97                                              |
| 4.8   | 11.48                                         | 12.12                                              | 4.7   | 11.28                                         | 11.94                                              |
| 4.05  | 9.94                                          | 10.66                                              | 14.85 | 21.63                                         | 21.95                                              |
| 8.45  | 16.84                                         | 17.25                                              | 3.4   | 8.44                                          | 9.23                                               |
| 30.7  | 26.09                                         | 26.46                                              | 8.05  | 16.38                                         | 16.81                                              |
| 6.8   | 14.79                                         | 15.28                                              | 6.05  | 13.67                                         | 14.21                                              |
| 4.25  | 10.37                                         | 11.07                                              | 10.95 | 19.16                                         | 19.51                                              |
| 4.15  | 10.15                                         | 10.86                                              | 11    | 19.20                                         | 19.55                                              |
| 6.65  | 14.57                                         | 15.07                                              | 4.55  | 10.99                                         | 11.65                                              |
| 3.5   | 8.68                                          | 9.46                                               | 10.85 | 19.08                                         | 19.43                                              |
| 3.7   | 9.15                                          | 9.91                                               | 5.7   | 13.10                                         | 13.66                                              |
| 12.35 | 20.18                                         | 20.51                                              | 12.8  | 20.47                                         | 20.80                                              |
| 4.55  | 10.99                                         | 11.65                                              | 6.1   | 13.75                                         | 14.28                                              |
| 3.5   | 8.68                                          | 9.46                                               | 9.55  | 17.96                                         | 18.33                                              |
| 8.6   | 17.00                                         | 17.40                                              | 12.8  | 20.47                                         | 20.80                                              |
| 6.55  | 14.43                                         | 14.93                                              | 3.3   | 8.20                                          | 9.00                                               |
| 8.45  | 16.84                                         | 17.25                                              | 4.55  | 10.99                                         | 11.65                                              |
| 5.25  | 12.32                                         | 12.92                                              | 6.35  | 14.13                                         | 14.65                                              |
| 4.95  | 11.77                                         | 12.40                                              | 9.15  | 17.57                                         | 17.96                                              |
| 10.05 | 18.41                                         | 18.78                                              | 4     | 9.83                                          | 10.55                                              |
| 3.35  | 8.32                                          | 9.12                                               | 6.15  | 13.83                                         | 14.36                                              |
| 13    | 20.59                                         | 20.92                                              | 13.45 | 20.87                                         | 21.19                                              |
| 21.9  | 24.27                                         | 24.60                                              | 8.75  | 17.16                                         | 17.56                                              |
| 11.25 | 19.39                                         | 19.74                                              | 4.05  | 9.94                                          | 10.66                                              |
| 4.35  | 10.58                                         | 11.27                                              | 6.2   | 13.90                                         | 14.43                                              |
| 4.9   | 11.67                                         | 12.31                                              | 5.95  | 13.51                                         | 14.06                                              |
| 4.25  | 10.37                                         | 11.07                                              | 5.15  | 12.14                                         | 12.75                                              |
| 10.5  | 18.80                                         | 19.15                                              | 13    | 20.59                                         | 20.92                                              |
| 17.25 | 22.72                                         | 23.04                                              | 8.25  | 16.61                                         | 17.03                                              |
| 15.45 | 21.93                                         | 22.24                                              |       |                                               |                                                    |
